# Supplementary material for: Uso actual de las Redes Sociales en estudiantes Mexicanos.
Source: Hindawi journal article supplement (doi:10.1155/2016/6840432), 2012-08-31

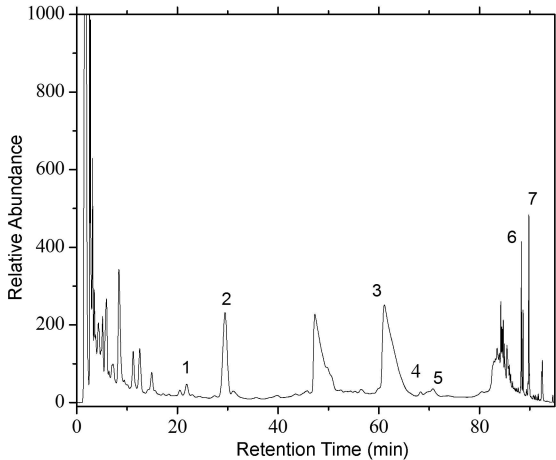

Supplement: f1 [file 6840432.f1.pdf]
